# Supplementary material for: Synthetic lethality between PAXX and XLF in mammalian development
Source: PubMed Central journal article supplement (PMC5088564; doi:10.1101/gad.290510.116), 2016-10-01

**Figure S6. *Paxx*<sup>-/-</sup> *Xlf*<sup>-/-</sup> mice show a synthetic lethal phenotype.** A) Photograph of 5 days old *Paxx*/*Xlf* mutants of the selected genotypes. Arrow indicates *Paxx*<sup>-/-</sup> *Xlf*<sup>-/-</sup> double mutant mouse. *Paxx*<sup>+</sup> genotype refers to a combination of *Paxx*<sup>+/+</sup> and *Paxx*<sup>+/-</sup> mice. B) Bar graphs presenting the body weight of the *Paxx*<sup>-/-</sup> *Xlf*<sup>-/-</sup> mouse as compared to age matched *Paxx*<sup>+/+</sup> *Xlf*<sup>+/+</sup> (n=4) and *Paxx*<sup>+/+</sup> *Xlf*<sup>-/-</sup> (n=4) controls at 10 days of age, as well as the weight of the spleen relative to their body weight. C) Bar graphs presenting the spleen cell counts of the *Paxx*<sup>-/-</sup> *Xlf*<sup>-/-</sup> mouse as compared to age matched *Paxx*<sup>+/+</sup> *Xlf*<sup>+/+</sup> (n=4) and *Paxx*<sup>+/+</sup> *Xlf*<sup>-/-</sup> (n=4) controls at 10 days of age, before or after red blood cell (RBC) lysis (log10 scale).

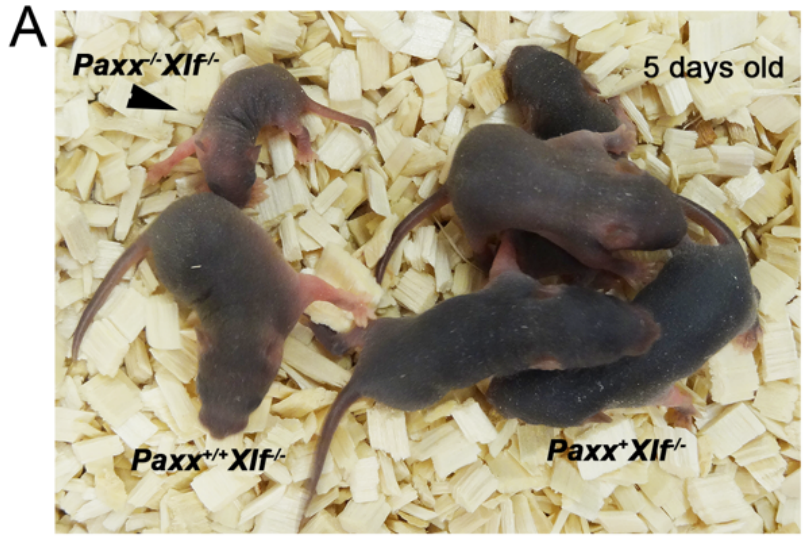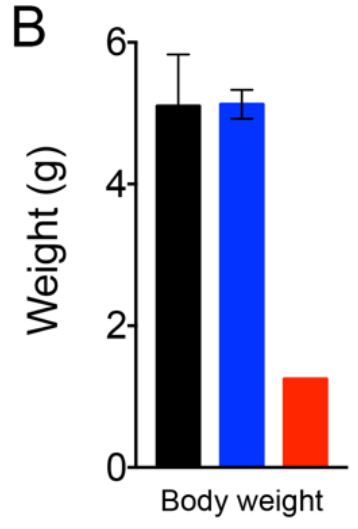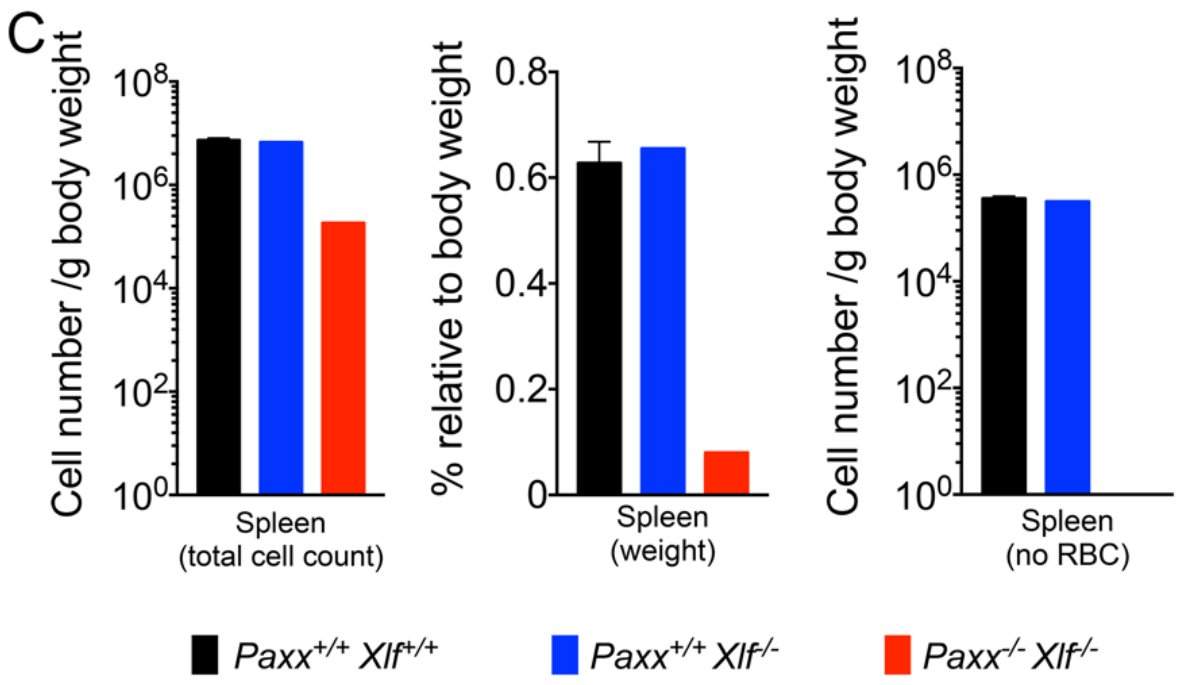

Supplement: supp_30.19.2152_Supplemental_Fig_S6.pdf [file supp_30.19.2152_Supplemental_Fig_S6.pdf]
